# Supplementary material
Source: publisher site journal article supplement (https://www.dovepress.com/get_supplementary_file.php?f=230620.docx)

Supplementary Table 1 Baseline characteristics

| Characteristic | Number (%) or average (range) |
| --- | --- |
| Age (years) | 60.4±10.5 (26~81) |
| Sex |  |
| Male | 74 (64.3) |
| Female | 41 (35.7) |
| Symptom |  |
| Epigastric pain | 46 (40.0) |
| Jaundice | 56 (48.7) |
| Serum bilirubin (mg/dL) | 8.2±7.9 (0.28~33.5) |
| Serum bilirubin (>3mg/dL) | 56 (48.7) |
| CEA (>4.7ng/mL) | 24 (20.9) |
| CA19-9 (>39U/mL) | 56 (48.7) |
| Preoperative biliary drainage | 25 (21.7) |

Supplementary Table 2 Clinicopathologic Characteristics

| Characteristic | Number (%) or average (range) |
| --- | --- |
| Tumor margin |  |
| Negative | 82 (71.3) |
| Positive | 33 (28.7) |
| Tumor size (cm) | 3.4±2.1 |
| Differentiation |  |
| Well | 77 (67.0) |
| Moderate | 28 (24.3) |
| Poor | 10 (8.7) |
| Vascular invasion | 7 (6.1) |
| Perineural invasion | 49 (42.6) |
| Lymph node metastasis |  |
| N0 | 61 (53.0) |
| N1 | 49 (42.6) |
| N2 | 5 (4.4) |
| TNM stage |  |
| I | 6 (5.22) |
| II | 37 (32.2) |
| IIIA | 18 (15.6) |
| IIIB | 40 (34.8) |
| IVA | 8 (7.0) |
| IVB | 6 (5.2) |
| Bismuth Type |  |
| I | 3 (2.6) |
| II | 21 (18.4) |
| IIIa | 17 (14.8) |
| IIIb | 27 (23.7) |
| IV | 47 (40.9) |

Supplementary Table 3 The rates of R0 resection for the different surgical

procedures in various types of hilar CC

| Surgery procedures (n) | R0 rate (%) |
| --- | --- |
| Total R0 resection | 82/115 (71.3) |
| Operation type (in type III and IV) | |
| With liver resection | 59/82 (72.0) |
| Without liver resection | 5/9 (55.6) |
| Type I | 3/3 (100) |
| Type II | 15/21 (71.4) |
| Type IIIa | 14/17 (82.4) |
| Type IIIb | 20/27 (74.1) |
| Type IV | 30/47 (63.8) |

Supplementary Figure 1. Distribution of patients by treatment depending on pretherapeutic workup and surgical findings.


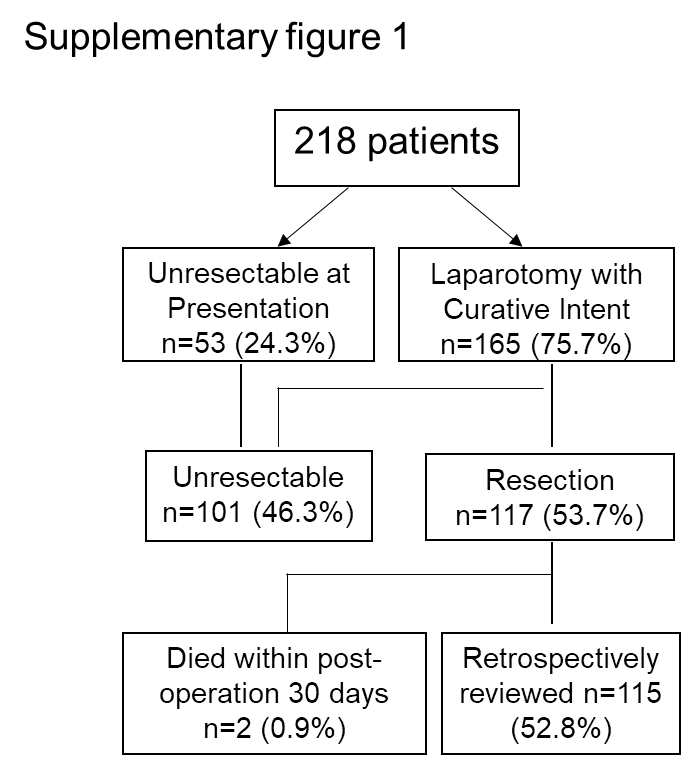


Supplementary Figure 2. The preoperative level of bilirubin was associated with postoperative liver function recovery. **P<0.05*


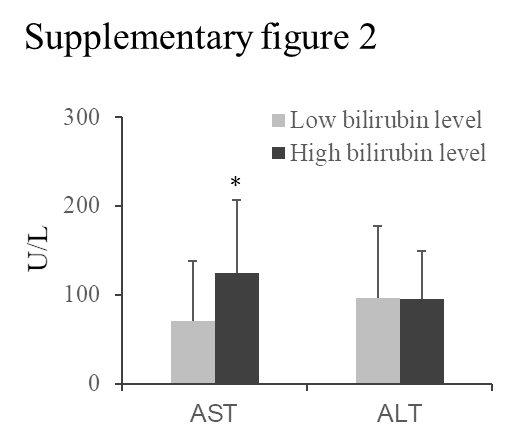

Supplement: Supplementary file 1 [file get_supplementary_file.php]
